# Supplementary material for: Mycobacterium llatzerense, a waterborne Mycobacterium, that resists phagocytosis by Acanthamoeba castellanii
Source: PubMed Central journal article supplement (PMC5385496; doi:10.1038/srep46270), 2017-04-10
Supplement: srep46270-s1.pdf [file srep46270-s1.pdf]

# ***Mycobacterium* *l*latzerense, a waterborne *mycobacterium*, that resists phagocytosis by *Acanthamoeba castellanii***

Vincent Delafont<sup>1,2,\*</sup>, Ascel Samba-Louaka<sup>1</sup>, Emmanuelle Cambau<sup>3</sup>, Didier Bouchon<sup>1</sup>, Laurent Moulin<sup>2</sup>,  
Yann Héchard<sup>1,\*</sup>

**1** Laboratoire Ecologie et Biologie des Interactions, Equipes « Microbiologie de l'Eau » et « Ecologie, Evolution, Symbioses », Université de Poitiers, UMR CNRS 7267, F-86073 Poitiers, France.

**2** Eau de Paris, Direction de la Recherche et du Développement pour la Qualité de l'Eau, R&D Biologie, 33, Avenue Jean Jaurès, F-94200 Ivry sur Seine, France

**3** APHP Groupe Hospitalier Saint-Louis Lariboisière-Fernand-Widal, Centre National de Référence des Mycobactéries et de la Résistance aux Antituberculeux ; UMR1137 IAME, Inserm, Université Paris Diderot, F-75010 Paris, France

• Current address: Division of Microbial Ecology, Department of Microbiology and Ecosystem Science, University of Vienna, Vienna, Austria

## **Supplementary information**

**Supplementary table 1: Primers designed in this study for targeting *M. llatzerense*'s selected conserved virulence factors.**

| Primer                | Sequences (5'-3')     | Target                              |
|-----------------------|-----------------------|-------------------------------------|
| Mll_peg1152_ndk_F     | AGCTGGCGACCAAGCACTAC  | <i>M. llatzerense ndk</i> gene      |
| Mll_peg1152_ndk_R     | TCGACGATGGCAGCCACAAC  |                                     |
| Mll_peg5571_ptpa_F    | TCCGCATGATGCGCTCGTTC  | <i>M. llatzerense ptpA</i> gene     |
| Mll_peg5571_ptpa_R    | AATCGTCGATGCCGCCGTAG  |                                     |
| Mll_peg150_PPE10_F    | TGGCAATGCCGGTGTGGATG  | <i>M. llatzerense ppe10</i> gene    |
| Mll_peg150_PPE10_R    | AGCAAGGCCGAATGCACCTC  |                                     |
| Mll_peg1752_Rv3707c_F | GTTCTGGCACATCGCAACTTC | <i>M. llatzerense rv3707c</i> gene  |
| Mll_peg1752_Rv3707c_R | AGTTCTCCCGTTGATGCTCAC |                                     |
| Mll_peg3132_cut2_F    | GCTCGGCGTTACTCATTGG   | <i>M. llatzerense cut2</i> gene     |
| Mll_peg3132_cut2_R    | CGGGCTGTTGAAGGTGAACG  |                                     |
| Mll_peg3860_glyA1_F   | GGCTCGGTGATGACCAACAAG | <i>M. llatzerense glyA1</i> gene    |
| Mll_peg3860_glyA1_R   | GATGGCGAGTTGCTCTGTGAC |                                     |
| Mll_peg1675_phop_F    | ACCCACGAGGTGTGAAAG    | <i>M. llatzerense phoP</i> gene     |
| Mll_peg1675_phop_R    | GCCCGCGTTGATGATGAAG   |                                     |
| Mll_peg1462_fbpa_F    | GCCCTTCCTGGTCAACATCTC | <i>M. llatzerense fbpA</i> gene     |
| Mll_peg1462_fbpa_R    | ATGTCGTCGGCCTTGTAGC   |                                     |
| Mll_peg4455_seca2_F   | CACGCGAAACTGGTCAAGG   | <i>M. llatzerense secA2</i> gene    |
| Mll_peg4455_seca2_R   | GTCGTTCTTGGCGTTCAGC   |                                     |
| Mll_peg5695_ptpb_F    | TTTCGATGCTCGCCGACTCC  | <i>M. llatzerense ptpB</i> gene     |
| Mll_peg5695_ptpb_R    | TGAATCCGGTGCGGTCCTTG  |                                     |
| Mll_peg4567_esxg_F    | CTCGGCAGTCGCGTTCCAG   | <i>M. llatzerense esxG</i> gene     |
| Mll_peg4567_esxg_R    | GTCGAGCAGGGCGTTGACC   |                                     |
| Mll_peg4567_esxg_F    | TGGCAGGCCAGTGGAAC     | <i>M. llatzerense esxH</i> gene     |
| Mll_peg4567_esxg_R    | TCGTGGGTGGTCGCCATC    |                                     |
| Mll_16S_F             | GGCCTTCGGGTTGTAAACCTC | <i>M. llatzerense 16S rRNA</i> gene |
| Mll_16S_R             | GTAGTTGGCCGGTGCTTCTTC |                                     |

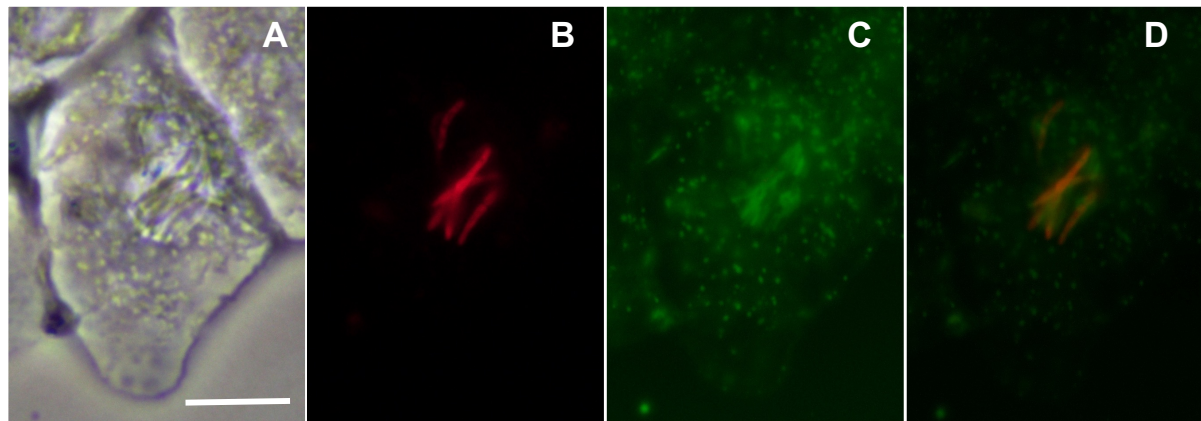

**Supplementary figure 1: Co-localisation of amoebal lipid bodies with *M. llatzerense*. Phase contrast of an *A. castellanii* trophozoite infected by *M. llatzerense* (A). *M. llatzerense* expressing the fluorescent protein mcherry (B). Fluorescent labelling of lipid bodies of amoebal origin using Bodipy (C). Overlay of fluorescent channels, highlighting the colocalisation of lipid bodies with mycobacteria (D). *M. llatzerense* transformed as described previously with the plasmid pCHERRY3, and were used to infect *A. castellanii* at a MOI of  $10^1$ . *A. castellanii* cultures were incubated prior to the infection with 10  $\mu$ M Bodipy 493/503 in PAS buffer supplemented with palmytic acid, as described by Barisch and colleagues<sup>2</sup>. After 4 hours of infection, samples were fixed using 4% PFA, and observed using epifluorescence microscope. Scale bar: 2.5  $\mu$ m.**

**Suuplementary table 2: Genes coding for proteins involved in phagosomal maturation arrest, shared between *M. tuberculosis* H37Rv and *M. Ilatzerense* CLUC14<sup>3</sup>. Identities and expectation values (E-values) are based on protein sequences comparison.**

| Gene identification in <i>M. tuberculosis</i> H37Rv | Product                                                   | Best BLAST hit in <i>M. Ilatzerense</i> CLUC14 | E-value | Identity (%) |
|-----------------------------------------------------|-----------------------------------------------------------|------------------------------------------------|---------|--------------|
| <i>Ndk</i> (Rv2445c)                                | Nucleoside diphosphate kinase                             | KIU14534                                       | 2e-78   | 82           |
| <i>PtpA</i> (Rv2234)                                | Low molecular weight protein tyrosine phosphatase         | KIU15786                                       | 3e-81   | 69           |
| <i>PPE10</i> (Rv0442c)                              | PPE family protein                                        | KIU17922                                       | 8e-16   | 36           |
| <i>PE_PGRS30</i> (rv1651c)                          | PPE family protein                                        | *                                              | *       | *            |
| <i>Rv3707c</i>                                      | Hypothetical protein                                      | KIU15472                                       | 6e-175  | 72           |
| <i>Cut2</i> (Rv2301)                                | Serine esterase, cutinase family                          | KIU18478                                       | 3e-80   | 61           |
| <i>GlyA1</i> (Rv1093)                               | Serine hydroxymethyl-transferase                          | KIU15277                                       | 0       | 69           |
| <i>PhoP</i> (Rv0757)                                | DNA-binding response regulator                            | KIU14827                                       | 1e-155  | 90           |
| <i>FbpA</i> (Rv3804c)                               | Antigen 85-A precursor (Antigen 85 complex A)             | KIU14430                                       | 5e-179  | 73           |
| <i>SecA2</i> (Rv1821)                               | Protein export cytoplasm protein SecA ATPase RNA helicase | KIU16850                                       | 0       | 83           |
| <i>PtpB</i> (Rv0153c)                               | Protein tyrosine phosphatase                              | KIU14697                                       | 2e-91   | 54           |
| <i>EsxG</i> (Rv0287)                                | ESAT-6 like protein EsxG                                  | KIU16620                                       | 7e-41   | 78           |
| <i>EsxH</i> (Rv0288)                                | ESAT-6-like protein EsxH, 10 kDa antigen CFP7             | KIU16619                                       | 3e-45   | 70           |

Legend: \*: no homologous protein found in *M. Ilatzerense* genome

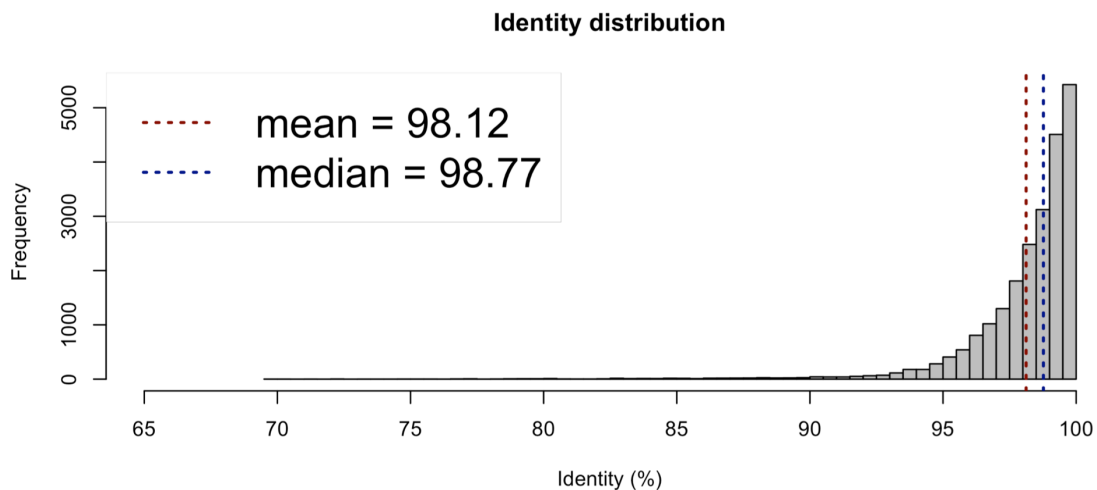

**Suuplementary figure 2: Estimation of two ways average nucleotide identity (ANI) between *M. Ilatzerense* EDP\_4 and *M. Ilatzerense* CLUC14. Assemblies were collected, and genome to genome average nucleotide identity was determined using the online tool ANI calculator (<http://enve-omics.ce.gatech.edu/ani/>), with a minimum alignment length of 500 nucleotides (corresponding to the smallest contig size for *M. Ilatzerense* EDP\_4), a window size of 500 nucleotides, and a step size of 100 nucleotides<sup>4</sup>. The resulting output was plotted according to the identity values on x axis, and the corresponding number of fragments (frequency). ANI calculation was based on alignment and comparison of 70% and 76% of sequences from *M. Ilatzerense* EDP\_4 and *M. Ilatzerense* CLUC14 assemblies, respectively.**

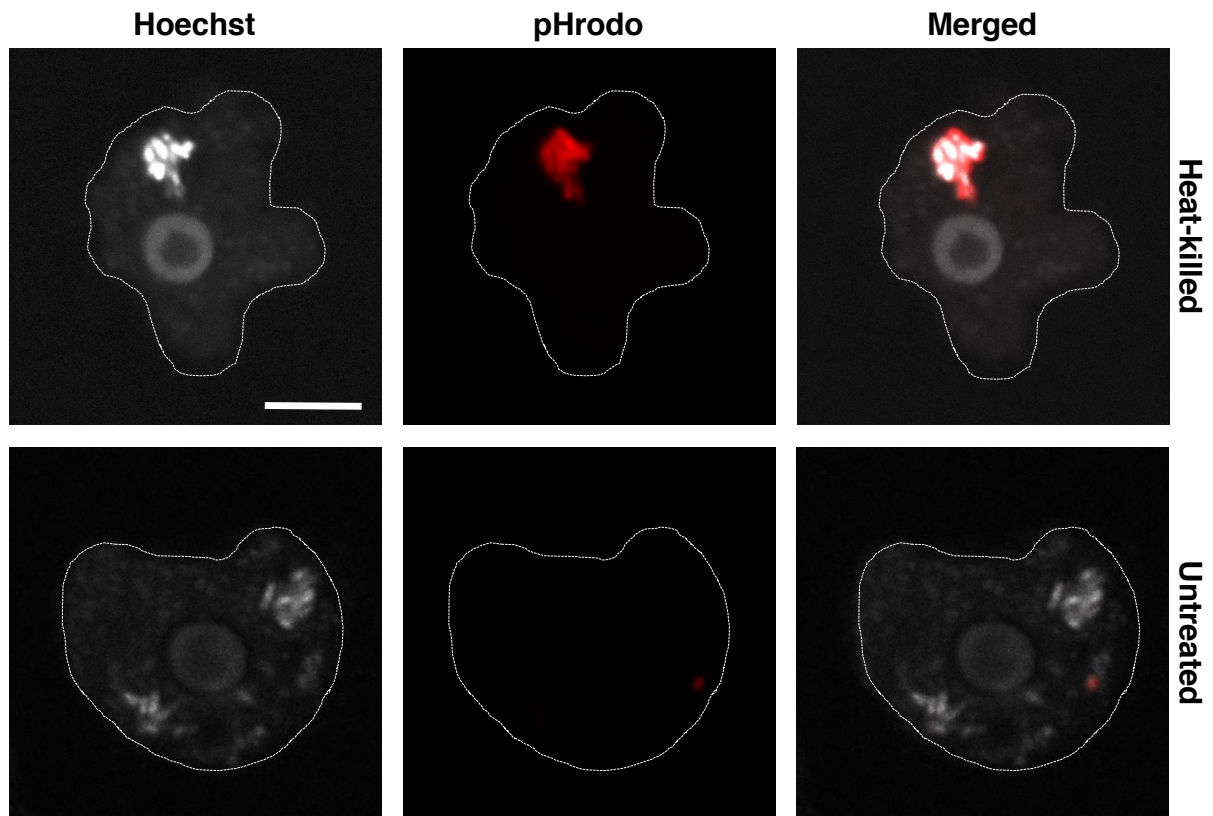

**Supplementary figure 3: Assessment of *M. llatzerense* localization within intracellular acidic compartments following infection of *A. castellanii*.** Amoeba cells were infected by *M. llatzerense* pre-labelled with pHrodo (red), as described in the methods, and visualised using confocal laser scanning microscope. Each micrograph was acquired using similar setting as to enable comparison of fluorescence intensity. Bar length represents 5µm.

## References :

1. Carroll, P. *et al.* Sensitive detection of gene expression in mycobacteria under replicating and non-replicating conditions using optimized far-red reporters. *PLoS One* **5**, e9823 (2010).
2. Barisch, C., Paschke, P., Hagedorn, M., Maniak, M. & Soldati, T. Lipid droplet dynamics at early stages of *Mycobacterium marinum* infection in *Dictyostelium*. *Cell. Microbiol.* (2015). doi:10.1111/cmi.12437
3. Greninger, A. L. *et al.* Two Rapidly Growing Mycobacterial Species Isolated from a Brain Abscess: First Whole-Genome Sequences of *Mycobacterium immunogenum* and *Mycobacterium llatzerense*. *J. Clin. Microbiol.* **53**, 2374–7 (2015).
4. Klappenbach, J. A. *et al.* DNA–DNA hybridization values and their relationship to whole-genome sequence similarities. *Int. J. Syst. Evol. Microbiol.* **57**, 81–91 (2007).
